# Supplementary material for: Effect of Significant Coronary Artery Stenosis on Prognosis in Patients with Vasospastic Angina: A Propensity Score-Matched Analysis
Source: MDPI journal article supplement (doi:10.3390/jcm10153341), 2021-07-28
Supplement: s1 [file s1]

Supplementary Table S1. One-vessel vs. Multi-vessel disease

| <b>One-year</b>     | <b>Significant stenosis<br/>(<i>n</i> = 189)</b> | <b>One-vessel<br/>(<i>n</i> = 161)</b> | <b>Multi-vessel<br/>(<i>n</i> = 28)</b> | <b><i>p</i>-value</b> |
|---------------------|--------------------------------------------------|----------------------------------------|-----------------------------------------|-----------------------|
| Composite events    | 11 (5.8)                                         | 8 (5.0)                                | 3 (10.7)                                | 0.211                 |
| ACS                 | 9 (4.8)                                          | 7 (4.3)                                | 2 (7.1)                                 | 0.624                 |
| Cardiac death       | 0 (0.0)                                          | 0 (0.0)                                | 0 (0.0)                                 | -                     |
| VT or VF            | 1 (0.5)                                          | 0 (0.0)                                | 1 (3.6)                                 | 0.148                 |
| AV block            | 1 (0.5)                                          | 1 (0.6)                                | 0 (0.0)                                 | 1.000                 |
| All-cause death     | 0 (0.0)                                          | 0 (0.0)                                | 0 (0.0)                                 | -                     |
| <b>Total period</b> |                                                  |                                        |                                         |                       |
| Composite events    | 17 (9.0)                                         | 14 (8.7)                               | 3 (10.7)                                | 0.722                 |
| ACS                 | 14 (7.4)                                         | 12 (7.5)                               | 2 (7.1)                                 | 1.000                 |
| Cardiac death       | 0 (0.0)                                          | 0 (0.0)                                | 0 (0.0)                                 | -                     |
| VT or VF            | 2 (1.1)                                          | 1 (0.6)                                | 1 (3.6)                                 | 0.276                 |
| AV block            | 1 (0.5)                                          | 1 (0.6)                                | 0 (0.0)                                 | 1.000                 |
| All-cause death     | 0 (0.0)                                          | 0 (0.0)                                | 0 (0.0)                                 | -                     |

ACS, acute coronary syndrome; AV, atrioventricular; VA, vasospastic angina; VF, ventricular fibrillation; VT, ventricular tachycardia

Supplementary Table S2. Baseline characteristics of matched population

|                                             | All ( <i>n</i> = 546) | No significant stenosis ( <i>n</i> = 364) | Significant stenosis ( <i>n</i> = 182) | <i>p</i> -value |
|---------------------------------------------|-----------------------|-------------------------------------------|----------------------------------------|-----------------|
| Age, years                                  | 58.2 ± 11.2           | 57.9 ± 11.4                               | 58.8 ± 10.6                            | 0.368           |
| Male, <i>n</i> (%)                          | 417 (76.4)            | 282 (77.5)                                | 135 (74.2)                             | 0.393           |
| BMI, kg/m <sup>2</sup>                      | 24.7 ± 3.6            | 24.8 ± 3.5                                | 24.7 ± 3.8                             | 0.767           |
| SBP, mmHg                                   | 128.0 ± 18.7          | 128.4 ± 18.2                              | 127.1 ± 19.8                           | 0.439           |
| DBP, mmHg                                   | 76.7 ± 12.4           | 76.9 ± 11.5                               | 76.1 ± 14.0                            | 0.448           |
| Previous CAD, <i>n</i> (%)                  | 85 (15.6)             | 53 (14.6)                                 | 32 (17.6)                              | 0.359           |
| Diabetes mellitus, <i>n</i> (%)             | 102 (18.7)            | 68 (18.7)                                 | 34 (18.7)                              | 1.000           |
| Hypertension, <i>n</i> (%)                  | 280 (51.3)            | 187 (51.4)                                | 93 (51.1)                              | 0.952           |
| Dyslipidemia, <i>n</i> (%)                  | 88 (16.1)             | 59 (16.2)                                 | 29 (15.9)                              | 0.934           |
| Alcohol drinking, <i>n</i> (%)              | 287 (52.6)            | 195 (53.6)                                | 92 (50.5)                              | 0.505           |
| Current smoking, <i>n</i> (%)               | 210 (38.5)            | 146 (40.1)                                | 64 (35.2)                              | 0.263           |
| <b>Laboratory finding</b>                   |                       |                                           |                                        |                 |
| Hemoglobin, g/dL                            | 14.0 ± 1.7            | 14.0 ± 1.8                                | 13.9 ± 1.5                             | 0.631           |
| Creatinine, mg/dL                           | 0.8 ± 0.2             | 0.8 ± 0.2                                 | 0.8 ± 0.2                              | 0.207           |
| Glucose, mg/dL                              | 115.1 ± 37.9          | 115.9 ± 40.6                              | 113.5 ± 32.2                           | 0.501           |
| hs-CRP, mg/dL                               | 1.0 ± 6.1             | 1.1 ± 7.1                                 | 0.7 ± 3.2                              | 0.459           |
| Total cholesterol, mg/dL                    | 169.2 ± 37.3          | 169.4 ± 36.6                              | 168.8 ± 38.8                           | 0.879           |
| LDL cholesterol, mg/dL                      | 99.3 ± 32.6           | 99.4 ± 32.0                               | 99.1 ± 33.7                            | 0.934           |
| Triglyceride, mg/dL                         | 150.5 ± 104.7         | 147.3 ± 99.5                              | 157.0 ± 114.4                          | 0.342           |
| HDL cholesterol, mg/dL                      | 45.1 ± 11.9           | 45.6 ± 12.2                               | 44.2 ± 11.3                            | 0.212           |
| LV EF, %                                    | 63.9 ± 7.0            | 64.2 ± 6.6                                | 63.4 ± 7.8                             | 0.265           |
| <b>Clinical diagnosis before ergonovine</b> |                       |                                           |                                        |                 |
| Angina, <i>n</i> (%)                        | 491 (89.9)            | 330 (90.7)                                | 161 (88.5)                             | 0.421           |
| Myocardial infarction, <i>n</i> (%)         | 10 (1.8)              | 4 (1.1)                                   | 6 (3.3)                                | 0.091           |
| Cardiac arrest, <i>n</i> (%)                | 8 (1.5)               | 6 (1.6)                                   | 2 (1.1)                                | 0.725           |
| Syncope, <i>n</i> (%)                       | 6 (1.1)               | 4 (1.1)                                   | 2 (1.1)                                | 1.000           |
| VT or VF, <i>n</i> (%)                      | 4 (0.7)               | 3 (0.8)                                   | 1 (0.5)                                | 1.000           |
| AV block, <i>n</i> (%)                      | 0 (0.0)               | 0 (0.0)                                   | 0 (0.0)                                | -               |

AV, atrioventricular; BMI, body mass index; CAD, coronary artery disease; CCB, calcium-channel blocker; DBP, diastolic blood pressure; HDL, high-density lipoprotein; hs-CRP, high

sensitive-C reactive protein; LDL, low-density lipoprotein; LV EF, left ventricular ejection fraction; SBP, systolic blood pressure; VF, ventricular fibrillation; VT, ventricular tachycardia.
